# Supplementary material for: Efficient and controllable ultrasound-assisted depolymerization of organosolv lignin catalyzed to liquid fuels by MCM-41 supported phosphotungstic acid
Source: Royal Society of Chemistry journal article supplement (doi:10.1039/d0ra05069e), 2020-01-01
Supplement: d0ra05069e1.pdf [file d0ra05069e1.pdf]

1  
2  
3  
4  
5  
6  
7  
8  
9  
10  
11  
12  
13  
14  
15

**Supporting Information for**

**Efficient and controllable ultrasound-assisted depolymerization of organosolv  
lignin catalyzed to liquid fuels by MCM-41 supported phosphotungstic acid**

Boyu Du <sup>a</sup>, Changzhou Chen <sup>b</sup>, Yang Sun <sup>c</sup>, Ming Yang <sup>a</sup>, Mengtian Yu <sup>a</sup>, Bingyang  
Liu <sup>a</sup>, Xing Wang <sup>a,b,d\*</sup>, Jinghui Zhou <sup>a,\*</sup>

<sup>a</sup> *Liaoning Key Laboratory of Pulp and Papermaking Engineering, Dalian*

*Polytechnic University, Dalian, Liaoning 116034, China*

<sup>b</sup> *Light Industry and Food Engineering College, Guangxi University, Nanning,*

*Guangxi 530004, China*

<sup>c</sup> *Department of Chemistry, Faculty of Engineering, Gunma University, Kiryu, Gunma,*

*376-8515, Japan*

<sup>d</sup> *State Key Laboratory of Pulp and Paper Engineering, South China University of*

*Technology, Guangzhou 510640, China*

16 **Table of Contents**

17 1. Ultrasound-assisted depolymerization of organosolv lignin

18 2. Analysis of catalysts

19 3. Analysis of organosolv lignin

20 4. Catalytic depolymerization of organosolv lignin in isopropanol

21 5. Analysis of bio-oil depolymerization products

22 6. Reference

23

## 24 **1. Ultrasound-assisted depolymerization of organosolv lignin**

25 The combined mixture collected from reactor was subsequently subjected to  
26 filtration. The filter cake was washed with isopropanol several times and then washed  
27 with THF several times in order to retrieve the unreacted lignin solid residue (SR). The  
28 SR was dried and weighed which including bio-char (BC) and catalyst. The dried SR  
29 was calcined in air at 550°C for 2 h, and the obtained solid was retrieved, dried, weighed  
30 and named as regenerated catalyst. The filtrate included two parts. One was phenolic  
31 monomer (PM) product which would go through qualitative and quantitative analysis  
32 by gas chromatography–mass spectrometry (GC–MS) and gas chromatography-flame  
33 ionization detector (GC-FID). The filtrate was subjected to liquid–liquid extraction  
34 with dichloromethane (DCM). Approximately 49 mL of extraction phase was mixed  
35 with a known quantity of N-tetradecane internal standard. The main aromatic  
36 monomers yields were calculated concentration using the effective carbon number  
37 (ECN) method <sup>1, 2</sup>. The other was bio-oil (BO) which was obtained by removing  
38 isopropanol and THF in the filtrate using a rotary evaporator. After that, solid fraction  
39 was dried at 60°C until a constant weight. In particular, the yield of liquid fuels (LF)  
40 was obtained by summing the yields of PM and BO, and the yield of lignin conversion  
41 (LC) was obtained by summing the yields of PM, BO and BC.

42

## 43 **2. Analysis of catalysts**

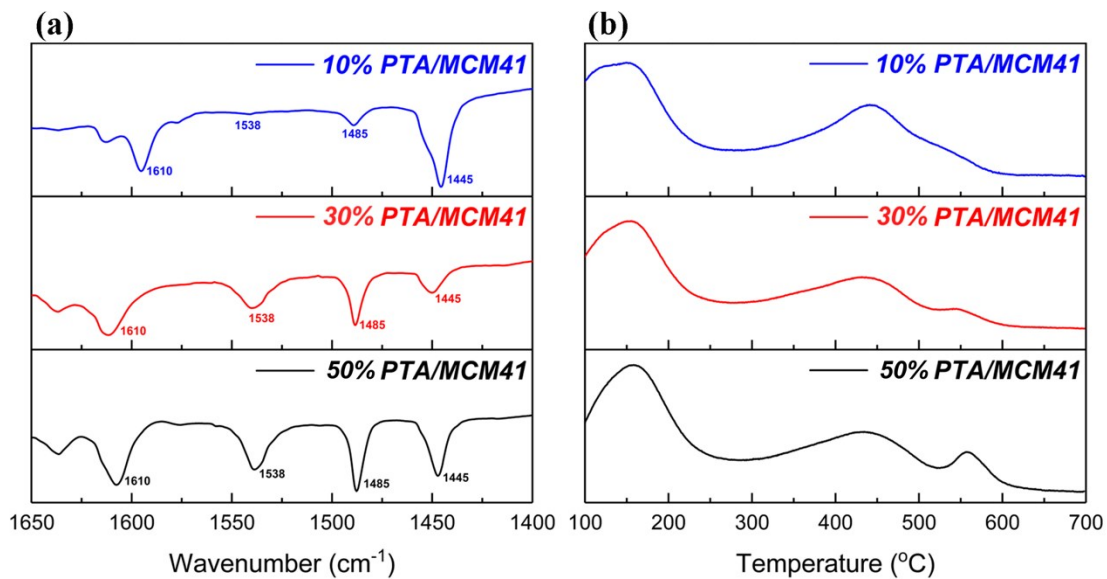

44

45 **Fig. S1.** The acidity of different catalysts: (a) FT-IR pyridine spectra, (b) NH<sub>3</sub>-TPD  
 46 spectra.

47

48 The SEM and EDS analyses of the different PTA/MCM-41 catalysts are illustrated  
 49 in Fig. S2. From the SEM images, it can be clearly inferred that the fresh different  
 50 PTA/MCM-41 catalysts show irregular morphology and has a heterogeneous particle  
 51 size distribution, which demonstrates a typical crystal structure. According to EDS  
 52 image, it indicates the uniform dispersion of PTA on the MCM-41 support.

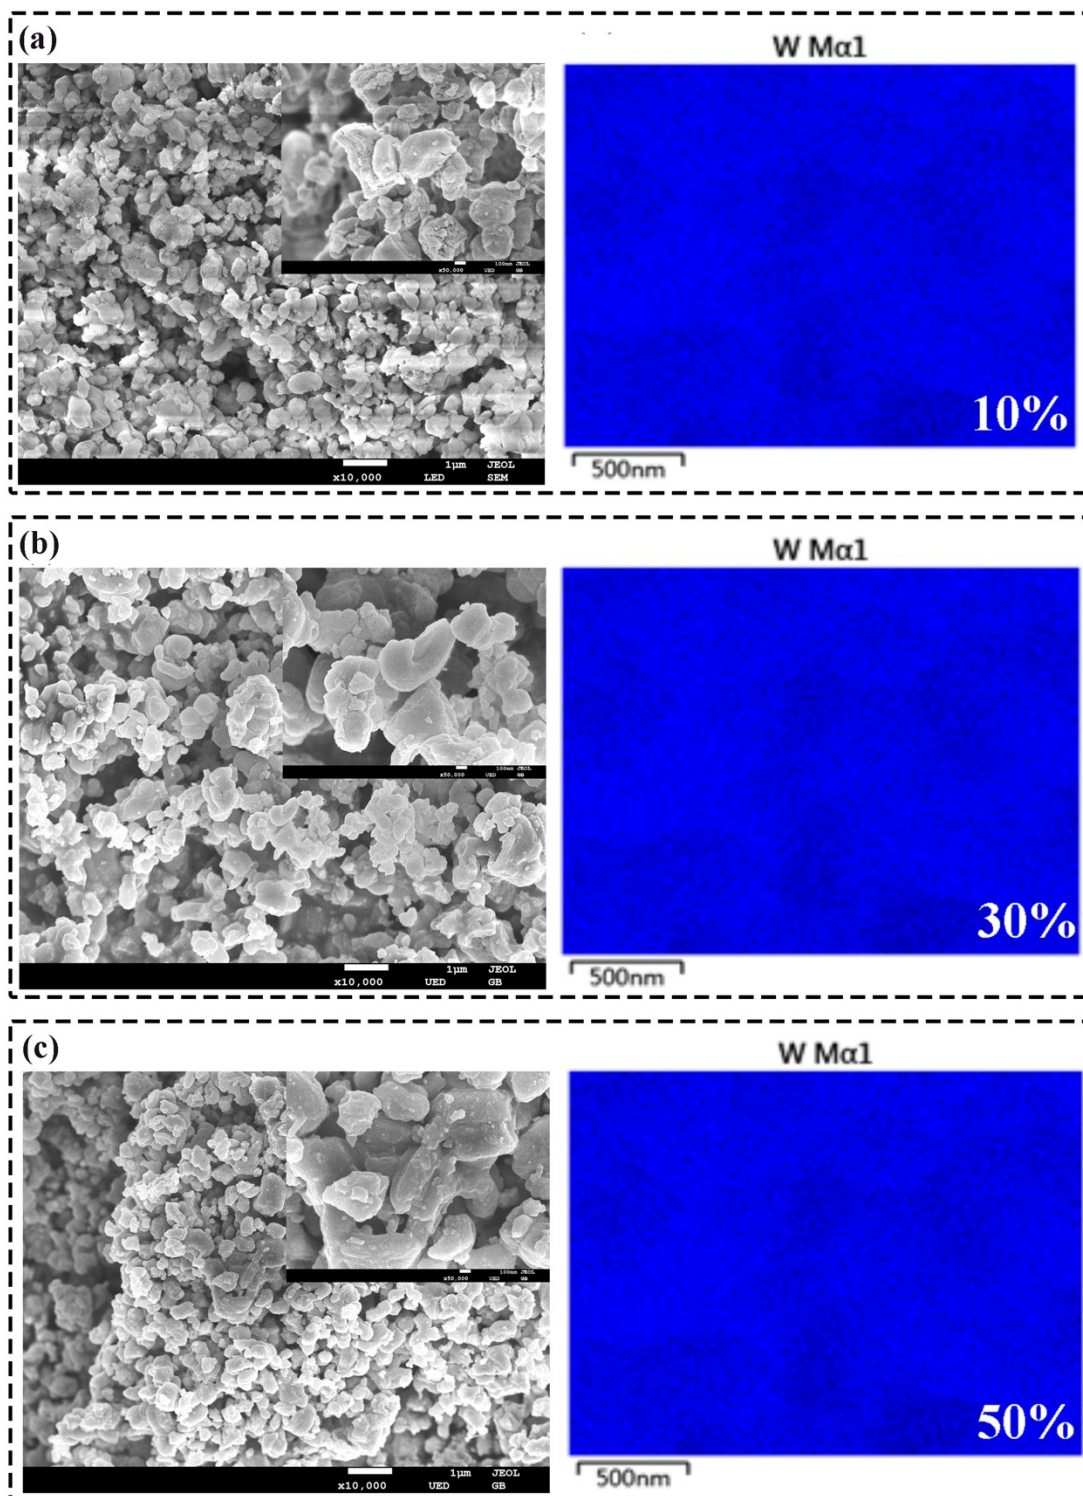

53  
 54 **Fig. S2.** The SEM and EDS images of different PTA/MCM-41 catalysts: (a) 10%  
 55 PTA/MCM-41 catalyst, (b) 30% PTA/MCM-41 catalyst and (c) 50% PTA/MCM-  
 56 41 catalyst.

57

58 **3. Analysis of organosolv lignin**

59 **Table S1** Assignment of main lignin signals in the 2D-HSQC NMR spectra of  
60 organosolv lignin <sup>3,4</sup>.

| Lignin structure                 | $\delta_c/\delta_h$ (ppm) | Assignment                                                                                           |
|----------------------------------|---------------------------|------------------------------------------------------------------------------------------------------|
| C <sub><math>\beta</math></sub>  | 53.1/3.46                 | C <sub><math>\beta</math></sub> -H <sub><math>\beta</math></sub> in phenylcoumaran (C)               |
| OCH <sub>3</sub>                 | 56.4/3.70                 | C-H in methoxyls                                                                                     |
| A <sub><math>\gamma</math></sub> | 59.9/3.35-3.80            | C <sub><math>\gamma</math></sub> - H <sub><math>\gamma</math></sub> in B-O-4 substructures (A)       |
| C <sub><math>\gamma</math></sub> | 62.2/3.76                 | C <sub><math>\gamma</math></sub> - H <sub><math>\gamma</math></sub> in phenylcoumaran (C)            |
| I <sub><math>\gamma</math></sub> | 61.2/4.09                 | C <sub><math>\beta</math></sub> - H <sub><math>\beta</math></sub> in cinnamyl alcohol end-groups (I) |
| B <sub><math>\gamma</math></sub> | 71.2/3.82-4.18            | C <sub><math>\beta</math></sub> - H <sub><math>\beta</math></sub> in $\beta$ - $\beta$ resinol (B)   |
| A <sub><math>\alpha</math></sub> | 71.8/4.86                 | C <sub><math>\alpha</math></sub> - H <sub><math>\alpha</math></sub> in B-O-4 unit (A, Erythro)       |
| A $\beta$ (G)                    | 83.4/4.38                 | C <sub><math>\beta</math></sub> - H <sub><math>\beta</math></sub> in B-O-4 linked to G (A)           |
| A $\beta$ (S)                    | 85.8/4.12                 | C <sub><math>\beta</math></sub> - H <sub><math>\beta</math></sub> in B-O-4 linked to S (A, Erythro)  |
| C <sub><math>\alpha</math></sub> | 86.8/5.45                 | C <sub><math>\alpha</math></sub> - H <sub><math>\alpha</math></sub> in phenylcoumaran (C)            |
| S <sub>2,6</sub>                 | 103.9/6.70                | C <sub>2,6</sub> - H <sub>2,6</sub> in syringyl units (S)                                            |
| S' <sub>2,6</sub>                | 106.3/7.32                | C <sub>2,6</sub> - H <sub>2,6</sub> in oxidized S units (S')                                         |
| G <sub>2</sub>                   | 110.8/6.97                | C <sub>2</sub> - H <sub>2</sub> in guaiacyl units (G)                                                |
| G <sub>5</sub>                   | 114.5/6.70                | C <sub>5</sub> - H <sub>5</sub> in guaiacyl units (G)                                                |
| G <sub>6</sub>                   | 119.0/6.78                | C <sub>6</sub> - H <sub>6</sub> in guaiacyl units (G)                                                |
| H <sub>2,6</sub>                 | 127.7/7.17                | C <sub>2,6</sub> - H <sub>2,6</sub> in H units (S)                                                   |
| PCA <sub>2,6</sub>               | 130.2/7.48                | C <sub>2,6</sub> - H <sub>2,6</sub> in p-coumarate (p-CE)                                            |
| PCA <sub>8</sub>                 | 113.7/6.24                | C <sub>8</sub> - H <sub>8</sub> in p-coumarate (p-CE)                                                |
| FA <sub>2</sub>                  | 110.7/7.35                | C <sub>2</sub> - H <sub>2</sub> in ferulate (p-FA)                                                   |
| FA <sub>8</sub>                  | 123.1/7.20                | C <sub>6</sub> - H <sub>6</sub> in ferulate (p-FA)                                                   |

61

62 **Table S2** Element composition and heating value of organosolv lignin.

| Entry | Sample | Elemental composition (wt.%) |      |       |      |      |      | HHV <sup>a</sup> |
|-------|--------|------------------------------|------|-------|------|------|------|------------------|
|       |        | C                            | H    | O     | N    | O/C  | H/C  |                  |
| 1     | OL     | 53.52                        | 5.36 | 44.95 | 0.17 | 0.82 | 0.08 | 19.08            |

63 <sup>a</sup> HHV (MJ/kg) = (34C+124.3H+6.3N+19.3S-9.8O)/100, where C, H, N, S, and O are  
64 the weight percentages of carbon, hydrogen, nitrogen, sulfur, and oxygen <sup>5,6</sup>.

65

66 **Table S3** Average molecular weight of organosolv lignin.

| Entry | Catalysts | Mw <sup>a</sup> (g/mol) | Mn <sup>a</sup> (g/mol) | PDI <sup>a</sup> (g/mol) |
|-------|-----------|-------------------------|-------------------------|--------------------------|
| 1     | OL        | 4750                    | 1540                    | 3.08                     |

67 <sup>a</sup> Mw: weight average molecular weight, Mn: number average molecular weight, PDI:  
68 polydispersity index and PDI=Mw/Mn.

69

70 **4. Catalytic depolymerization of organosolv lignin in isopropanol**



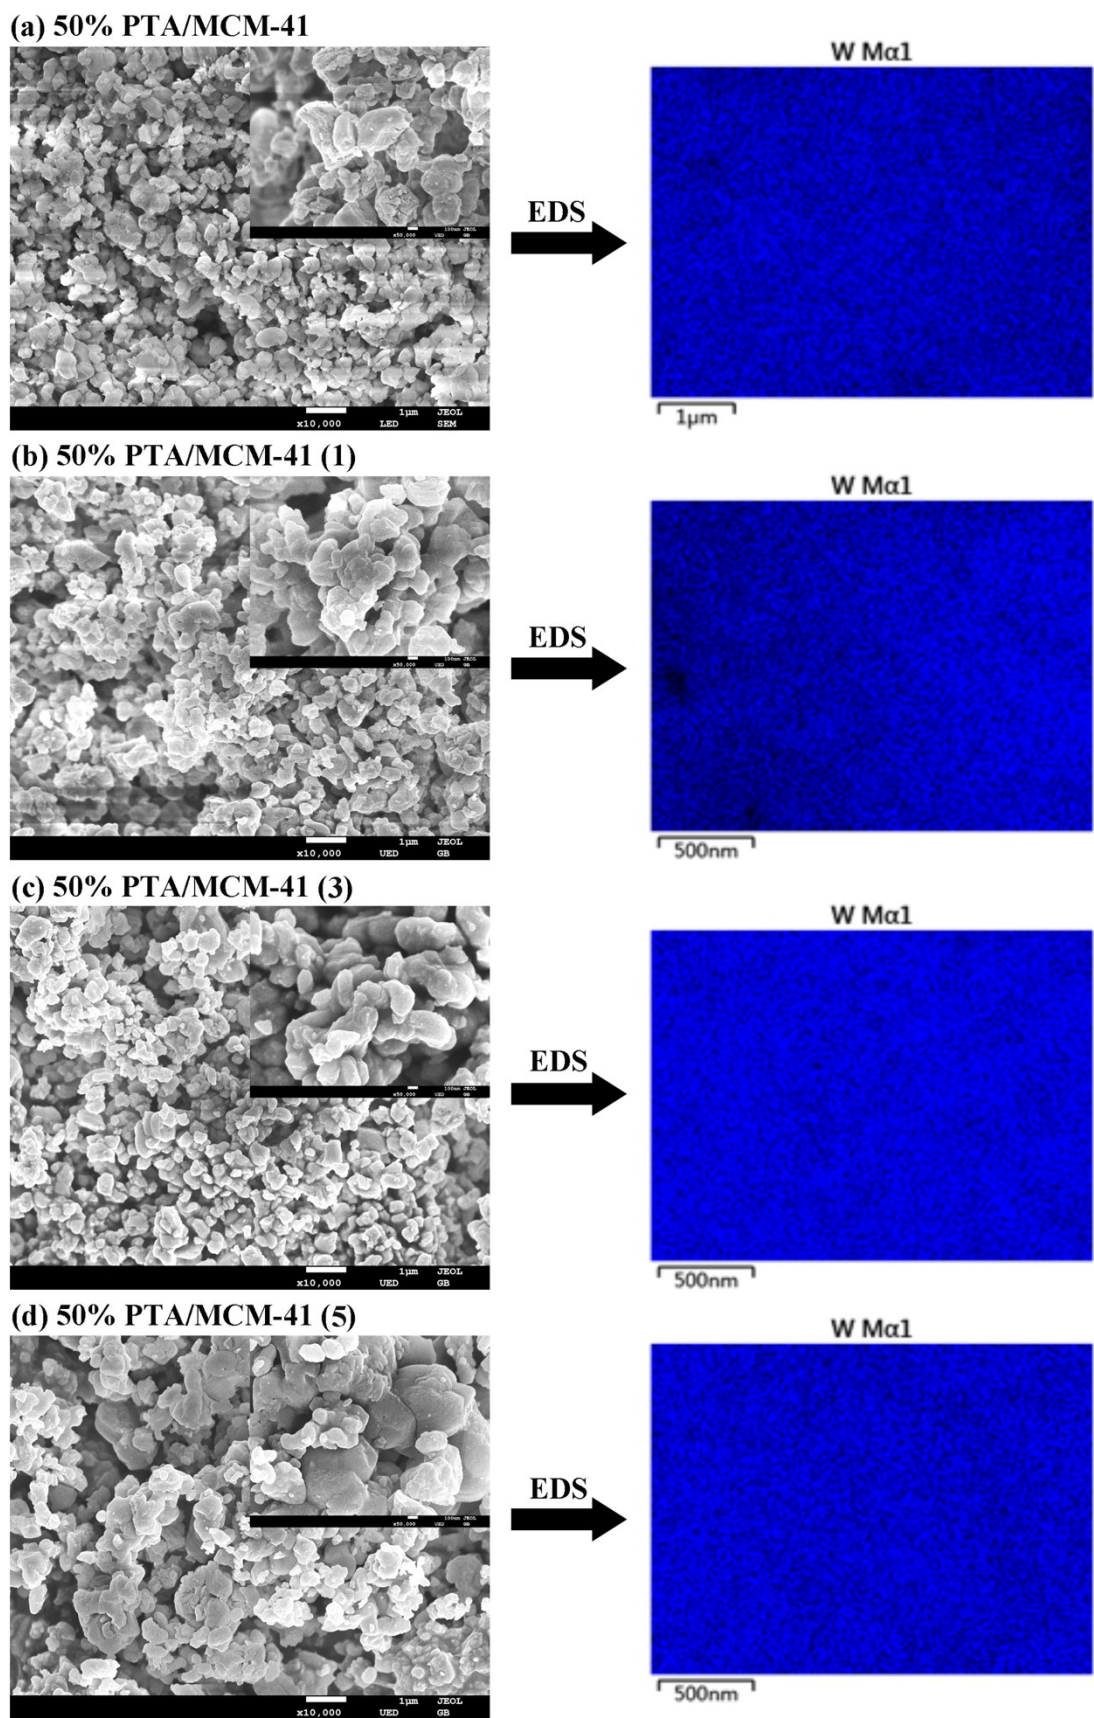

71

72

73

**Fig. S3.** The SEM and EDS images of original catalyst and different regenerated catalysts.



74

75 **5. Analysis of bio-oil depolymerization products**

76 **Table S4** Average molecular weight of depolymerization product bio-oil obtained from  
77 different reaction conditions.

| Entry | Reaction conditions                    | Mw <sup>a</sup> | Mn <sup>a</sup> | PDI <sup>a</sup> |
|-------|----------------------------------------|-----------------|-----------------|------------------|
| 1     | 270°C <sup>b</sup>                     | 1280            | 510             | 2.53             |
| 2     | 290°C <sup>b</sup>                     | 940             | 520             | 1.83             |
| 3     | 310°C <sup>b</sup>                     | 810             | 510             | 1.58             |
| 4     | 330°C <sup>b</sup>                     | 980             | 560             | 1.76             |
| 5     | 350°C <sup>b</sup>                     | 1160            | 640             | 1.81             |
| 6     | 0.5 h <sup>c</sup>                     | 1720            | 670             | 2.56             |
| 7     | 2 h <sup>c</sup>                       | 1560            | 710             | 2.21             |
| 8     | 4 h <sup>c</sup>                       | 930             | 530             | 1.75             |
| 9     | 8 h <sup>c</sup>                       | 1040            | 620             | 1.69             |
| 10    | Ethanol <sup>d</sup>                   | 1050            | 530             | 1.99             |
| 11    | Methanol <sup>d</sup>                  | 940             | 540             | 1.73             |
| 12    | 10 % ultrasonic frequency <sup>e</sup> | 790             | 500             | 1.57             |
| 13    | 20 % ultrasonic frequency <sup>e</sup> | 730             | 490             | 1.48             |
| 14    | 30 % ultrasonic frequency <sup>e</sup> | 650             | 520             | 1.24             |
| 15    | 40 % ultrasonic frequency <sup>e</sup> | 720             | 530             | 1.36             |
| 16    | 50 % ultrasonic frequency <sup>e</sup> | 990             | 660             | 1.51             |

78 <sup>a</sup> Mw: weight average molecular weight, Mn: number average molecular weight and  
79 PDI: polydispersity index.

80 <sup>b</sup> Reaction condition: 0.5 g OL, 0.25 g 50% PTA/MCM-41 catalysts, 30 mL  
81 isopropanol, 30 ml deionized-water and 6 h.

82 <sup>c</sup> Reaction condition: 0.5 g OL, 0.25 g 50% PTA/MCM-41 catalysts, 30 mL  
83 isopropanol, 30 ml deionized-water and 310°C.

84 <sup>d</sup> Reaction condition: 0.5 g OL, 0.25 g 50% PTA/MCM-41 catalysts, 30 ml deionized-

85 water, 310°C and 6 h.

86 <sup>e</sup> Reaction condition: 0.5 g OL, 0.25 g 50% PTA/MCM-41 catalysts, 30 mL

87 isopropanol, 30 ml deionized-water, 310°C and 6 h.

88

89 **Table S5** The effect of different reaction conditions on elemental compositions and

90 heating value of depolymerization product bio-oil.

| Entry | Reaction conditions                    | Elemental composition (wt.%) |       |       |      |      |      | HHV <sup>a</sup> |
|-------|----------------------------------------|------------------------------|-------|-------|------|------|------|------------------|
|       |                                        | C                            | H     | O     | N    | O/C  | H/C  |                  |
| 1     | 270°C <sup>b</sup>                     | 60.69                        | 6.57  | 32.62 | 0.12 | 0.54 | 0.11 | 25.61            |
| 2     | 290°C <sup>b</sup>                     | 64.13                        | 8.38  | 27.38 | 0.11 | 0.43 | 0.13 | 29.54            |
| 3     | 310°C <sup>b</sup>                     | 67.39                        | 10.94 | 21.58 | 0.09 | 0.32 | 0.16 | 34.41            |
| 4     | 330°C <sup>b</sup>                     | 65.12                        | 10.42 | 24.35 | 0.11 | 0.37 | 0.16 | 34.01            |
| 5     | 350°C <sup>b</sup>                     | 62.17                        | 10.12 | 27.56 | 0.15 | 0.44 | 0.16 | 31.02            |
| 6     | 0.5 h <sup>c</sup>                     | 57.27                        | 7.49  | 35.13 | 0.11 | 0.61 | 0.13 | 25.34            |
| 7     | 2 h <sup>c</sup>                       | 60.35                        | 7.65  | 31.86 | 0.14 | 0.53 | 0.13 | 26.92            |
| 8     | 4 h <sup>c</sup>                       | 65.22                        | 8.89  | 25.73 | 0.16 | 0.39 | 0.14 | 30.71            |
| 9     | 8 h <sup>c</sup>                       | 66.05                        | 9.98  | 23.84 | 0.13 | 0.36 | 0.15 | 32.53            |
| 10    | Ethanol <sup>d</sup>                   | 63.79                        | 8.21  | 27.85 | 0.15 | 0.44 | 0.13 | 29.17            |
| 11    | Methanol <sup>d</sup>                  | 64.88                        | 10.46 | 24.53 | 0.13 | 0.38 | 0.16 | 32.67            |
| 12    | 10 % ultrasonic frequency <sup>e</sup> | 69.46                        | 10.46 | 19.95 | 0.13 | 0.29 | 0.15 | 34.67            |
| 13    | 20 % ultrasonic frequency <sup>e</sup> | 68.35                        | 11.37 | 20.17 | 0.11 | 0.29 | 0.17 | 35.40            |
| 14    | 30 % ultrasonic frequency <sup>e</sup> | 73.79                        | 10.84 | 15.31 | 0.06 | 0.26 | 0.15 | 37.07            |
| 15    | 40 % ultrasonic frequency <sup>e</sup> | 73.03                        | 10.36 | 16.48 | 0.13 | 0.23 | 0.14 | 36.10            |
| 16    | 50 % ultrasonic frequency <sup>e</sup> | 72.79                        | 8.78  | 18.34 | 0.09 | 0.25 | 0.12 | 33.88            |

91 <sup>a</sup> HHV (MJ/kg) = (34C+124.3H+6.3N+19.3S-9.8O)/100, where C, H, N, S, and O are  
92 the weight percentages of carbon, hydrogen, nitrogen, sulfur, and oxygen <sup>6,7</sup>.

93 <sup>b</sup> Reaction condition: 0.5 g OL, 0.25 g 50% PTA/MCM-41 catalysts, 30 mL

94 isopropanol, 30 ml deionized-water and 6 h.

95 <sup>c</sup> Reaction condition: 0.5 g OL, 0.25 g 50% PTA/MCM-41 catalysts, 30 mL  
96 isopropanol, 30 ml deionized-water and 310°C.

97 <sup>d</sup> Reaction condition: 0.5 g OL, 0.25 g 50% PTA/MCM-41 catalysts, 30 ml deionized-  
98 water, 310°C and 6 h.

99 <sup>e</sup> Reaction condition: 0.5 g OL, 0.25 g 50% PTA/MCM-41 catalysts, 30 mL  
100 isopropanol, 30 ml deionized-water, 310°C and 6 h.

101

## 102 **6. Reference**

103 1. L.-P. Xiao, S. Wang, H. Li, Z. Li, Z.-J. Shi, L. Xiao, R.-C. Sun, Y. Fang and G.  
104 Song, ACS Catalysis, 2017, 7, 7535-7542.

105 2. X. Wang, B. Du, L. Pu, Y. Guo, H. Li and J. Zhou, Journal of Analytical and  
106 Applied Pyrolysis, 2018, 129, 13-20.

107 3. J.-L. Wen, B.-L. Xue, S.-L. Sun and R.-C. Sun, Journal of Chemical  
108 Technology & Biotechnology, 2013, 88, 1663-1671.

109 4. J.-L. Wen, T.-Q. Yuan, S.-L. Sun, F. Xu and R.-C. Sun, Green Chem., 2014, 16,  
110 181-190.

111 5. M. Zhou, B. K. Sharma, J. Li, J. Zhao, J. Xu and J. Jiang, Fuel, 2019, 239, 239-  
112 244.

113 6. L. Kong, C. Liu, J. Gao, Y. Wang and L. Dai, Bioresource Technology, 2019,  
114 276, 310-317.

115 7. X. Liu, Z. Jiang, S. Feng, H. Zhang, J. Li and C. Hu, Fuel, 2019, 244, 247-257.  
116
